# Supplementary material for: Design of a prospective, multicenter, global, cohort study of electromagnetic navigation bronchoscopy
Source: PubMed Central journal article supplement (PMC4845335; doi:10.1186/s12890-016-0228-y), 2016-04-26
Supplement: 12890_2016_228_MOESM1_ESM.pdf [file 12890_2016_228_MOESM1_ESM.pdf]

### Additional File 1, Activated Sites as of February 19, 2016

As of February 19, 2016, 23 clinical sites in the United States and Europe had been activated into the NAVIGATE study. Additional site selection and activation is ongoing. The study protocol has prespecified up to 75 clinical sites in the United States, Europe, and Asia as needed to meet a final enrollment of up to 2,500 subjects. As of February 2016, study enrollment was progressing on schedule to reach the planned number of approximately 2,500 subjects; however, final enrollment and site numbers may change.

|    | Site Name                                           | City       | State or Country | Region | Principal Investigator |
|----|-----------------------------------------------------|------------|------------------|--------|------------------------|
| 1  | Pulmonary and Critical Care Associates of Baltimore | Baltimore  | MD               | USA    | Krimsky, William       |
| 2  | Pulmonary & Sleep of Tampa Bay                      | Brandon    | FL               | USA    | Zanchi, Dragos         |
| 3  | Virtua Medical Group, PA                            | Marlton    | NJ               | USA    | Sztejman, Eric         |
| 4  | Pinehurst Medical Center                            | Pinehurst  | NC               | USA    | Pritchett, Michael     |
| 5  | The University of Chicago                           | Chicago    | IL               | USA    | Murgu, Septimiu        |
| 6  | Providence Health Center                            | Waco       | TX               | USA    | Murillo, Borris        |
| 7  | University of Rochester                             | Rochester  | NY               | USA    | Nead, Michael          |
| 8  | Blount Memorial Hospital                            | Maryville  | TN               | USA    | LeMense, Greg          |
| 9  | Cancer Treatment Centers of America                 | Newnan     | GA               | USA    | Bechara, Rabih         |
| 10 | Penn Highlands Healthcare - DuBois                  | DuBois     | PA               | USA    | Bansal, Sandeep        |
| 11 | Duke University                                     | Durham     | NC               | USA    | Wahidi, Momen          |
| 12 | Charleston Area Medical Center                      | Charleston | WV               | USA    | Takubo, Tom            |
| 13 | East Texas Medical Center                           | Tyler      | TX               | USA    | Gass, G. David         |
| 14 | Carolinas Healthcare System                         | Charlotte  | NC               | USA    | Singh, Jaspal          |
| 15 | University of Cincinnati Physicians Company LLC     | Cincinnati | OH               | USA    | Benzaquen, Sadia       |
| 16 | Vanderbilt University Medical Center                | Nashville  | TN               | USA    | Rickman, Otis          |
| 17 | University of Alabama at Birmingham                 | Birmingham | AL               | USA    | Minnich, Douglas       |
| 18 | Pulmonary Associates of Mobile, PC                  | Mobile     | AL               | USA    | Ellis, Blesilda        |
| 19 | AKH Linz                                            | Linz       | Austria          | Europe | Lamprecht, Bernd       |
| 20 | Gunderson Lutheran Medical Foundation, Inc.         | LaCrosse   | WI               | USA    | Mattingley, Jennifer   |
| 21 | University Hospitals of Case Medical Center         | Cleveland  | OH               | USA    | Linden, Philip         |
| 22 | East Carolina University                            | Greenville | NC               | USA    | Bowling, Mark          |
| 23 | University of Michigan Health Systems               | Ann Arbor  | MI               | USA    | Arenberg, Douglas      |
