# Supplementary material for: Design of a prospective, multicenter, global, cohort study of electromagnetic navigation bronchoscopy
Source: PubMed Central journal article supplement (PMC4845335; doi:10.1186/s12890-016-0228-y), 2016-04-26
Supplement: 12890_2016_228_MOESM2_ESM.pdf [file 12890_2016_228_MOESM2_ESM.pdf]

## Additional File 2, Calculated Probability of Malignancy

The pre-procedure probability of malignancy will be calculated for each patient and compared to investigator-determined probability and long-term outcomes. The probability of malignancy is calculated based on the patient’s clinical profile and radiographic findings. A multiple regression model has been developed that includes the following factors: (1) patient age; (2) smoking history; (3) history of extrathoracic malignancy; (4) nodule size; (5) nodule border characteristics; and (6) nodule location.

### The equation is calculated as follows:

Probability of malignancy =  $e^x / (1 + e^x)$ .

### Where:

$x = -6.8272 + (0.0391 * \text{“age”}) + (0.7917 * \text{“cigarettes”}) + (1.3388 * \text{“cancer”}) + (0.1274 * \text{“diameter”}) + (1.047 * \text{“spiculation”}) + (0.7838 * \text{“upper lobe”})$

|               |                                                                                                      |
|---------------|------------------------------------------------------------------------------------------------------|
| e             | the mathematical constant (Euler's number)                                                           |
| ^             | to the power of                                                                                      |
| “age”         | patient's age in years                                                                               |
| “cigarettes”  | 1 if current or former smoker, otherwise 0                                                           |
| “cancer”      | 1 if patient has history of extrathoracic cancer diagnosed >5 years before presentation, otherwise 0 |
| “diameter”    | diameter of the solitary pulmonary nodule in mm                                                      |
| “spiculation” | 1 if spiculation is present, otherwise 0                                                             |
| “upper lobe”  | 1 if the nodule is located in the upper lobe, otherwise 0                                            |

### References

1. Swensen SJ, Silverstein MD, Ilstrup DM, et al. The probability of malignancy in solitary pulmonary nodules. Application to small radiologically indeterminate nodules. Arch Intern Med 1997;157:849-855.
2. Folch E, Mazzone P. Evaluation of Solitary Pulmonary Nodules. [Epocrates, an athenahealth company Web Site] September 26, 2014. Available at <https://online.epocrates.com/u/2921547/Evaluation+of+solitary+pulmonary+nodule>. Accessed June 4, 2015.
