# Supplementary material for: Design of a prospective, multicenter, global, cohort study of electromagnetic navigation bronchoscopy
Source: PubMed Central journal article supplement (PMC4845335; doi:10.1186/s12890-016-0228-y), 2016-04-26

### Additional File 3, Peripheral Lung Lesion Definition

For the purposes of NAVIGATE data collection, a peripheral lung lesion is defined as a lesion that is located in the outer third of the lung and difficult to reach by traditional bronchoscopy, in accordance with the following visual aid:

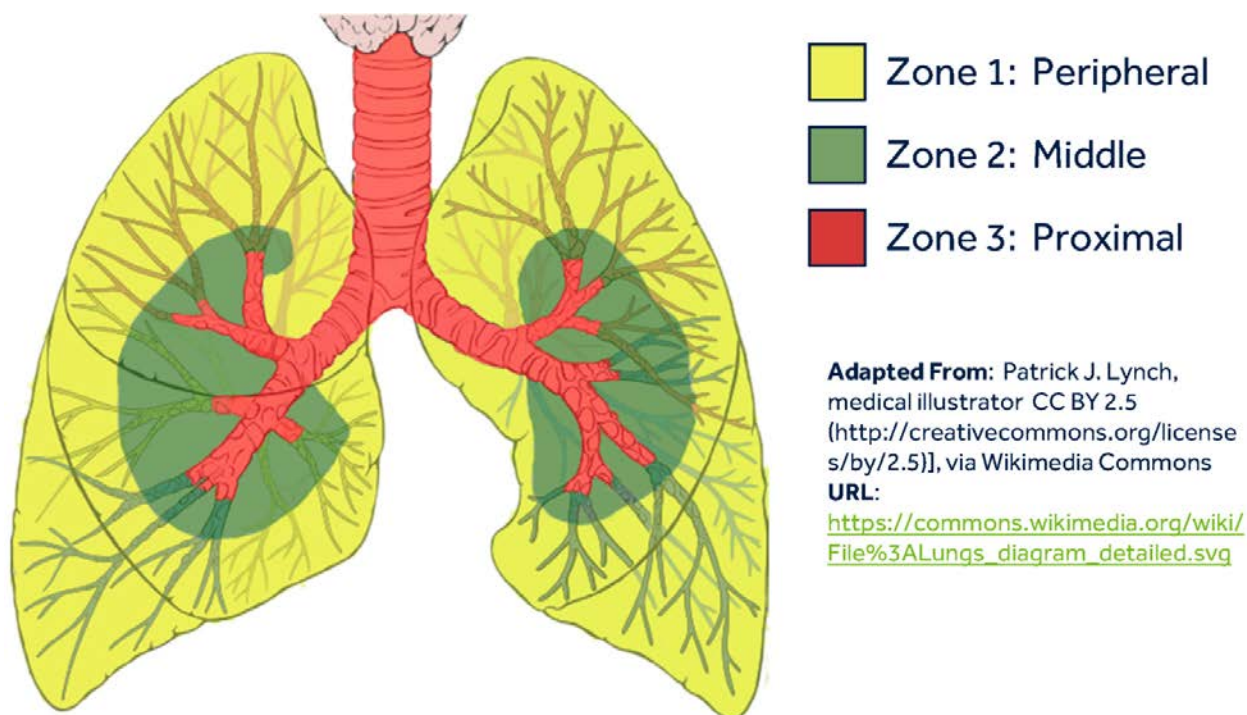

Supplement: 12890_2016_228_MOESM3_ESM.pdf [file 12890_2016_228_MOESM3_ESM.pdf]
